# Supplementary material for: Newborn Screening for Presymptomatic Diagnosis of Complement and Phagocyte Deficiencies
Source: PubMed Central journal article supplement (PMC7090021; doi:10.3389/fimmu.2020.00455), 2020-03-17
Supplement: Data_Sheet_1.pdf [file Data_Sheet_1.pdf]

## Supplementary material

# Newborn Screening for Presymptomatic Diagnosis of Complement and Phagocyte Deficiencies

Dezfouli et al.

## Supplementary Results

### *Assessment of protein profiling in DBS samples*

Protein profiling of three healthy control DBS and matched whole blood samples in three replicates showed strongly correlated signal intensities ( $R= 0.96$ ) within the two sample types, confirming successful protein elution from the filter paper (**Figure S1, A**). Equal profiles were observed for a separate labeling step (for an additional 2 hours) after 2 hours elution of proteins from the filter paper, compared to simultaneous elution and labeling (merged for 2 hours). The obtained results from four distinct antibodies confirmed the possibility of reducing the merged elution and labeling time to as little as 10 minutes, with the highest signal-to-background ratio after 30 minutes of merged elution and labeling at ambient temperature (**Figure S1, B**). A significant correlation to the sample dilution factor ( $R$  mean = 0.98) was observed in the linearity-of-dilution test and confirmed the functionality of the capture antibodies in the complex whole-blood sample context (**Figure S1, C**). Finally, recombinant human C2 protein, spiked into eluate of a C2-deficient DBS sample, confirmed the regain of signals by the addition of the defective protein (**Figure S1, D**).

### *Assessment of the effect of age on protein measurements*

Investigating the effect of age difference on the proteomic profiles of 6 healthy DBS samples (3 infant and 3 adult samples), no significant differences were observed between infants and adult individuals, although the measurements showed slightly lower protein amounts (on average 1:1.4) in infants versus adult individuals. This is previously described as lower

immune-related protein levels in neonates, normalized by development and activation of the innate immunity through environmental microbial encounter after birth [1].

#### *Assessment of sandwich assays as second-tier screening*

In an anticipated nation-wide screening, a more selective detection is required for a second confirmation of indistinct reports, commonly known as the second-tier assays. For this, single-target experiments in a sandwich format were designed and performed. Results showed selective signals from the corresponding capture and detection antibodies, confirming the possibility of using sandwich immunoassays as the second-tier measurement following the population-scale screening (**Figure S3**).

#### *Assessment of expanding the bead array content*

The possibility to expand the profiling in order to cover additional proteins and disorders was investigated. Suspension bead array technology was used with a collection of 2009 randomly selected antibodies to profile 1203 protein targets in three healthy control DBS samples. Measurements were done in six experiments with multiplex detections from up to 394 antibodies per assay. The results showed signal-to-noise ratio $\geq 1$  for 1156 of the random targets (>96%), confirming the possibility for an extended array for analyzing DBS samples, reaching beyond the presented panel of 22 proteins (**Figure S4**).

## Supplementary Tables

**Table S1.** Information on the protein targets, antibodies, and recombinant proteins used as capture or detection reagents in suspension bead array experiments.

| Antibody / Protein coupled to bead array | Provider                             | Product number/ batch | Related PID / Disorder **        |
|------------------------------------------|--------------------------------------|-----------------------|----------------------------------|
| C1qA                                     | R&D Systems                          | MAB4035/Clone394107   | C1 deficiency, SLE               |
| C1qB*                                    | Human Protein Atlas                  | HPA052116             | C1 deficiency, SLE               |
| C1s                                      | Human Protein Atlas                  | HPA018852             | C1 deficiency, SLE               |
| C2b*                                     | R&D Systems                          | MAB1936/Clone269716   | C2 deficiency, SLE               |
| C3                                       | Human Protein Atlas                  | HPA020432             | C3 deficiency LOF, GN, aHUS      |
| C3                                       | Biosystems International Kft         | Bsi019/ 0190-2        | C3 deficiency LOF, GN, aHUS      |
| C3a*                                     | R&D Systems                          | MAB3677               | C3 deficiency LOF, GN, aHUS      |
| C4A                                      | Biosystems International Kft         | Bsi0150/0150090310    | C4 deficiency, SLE               |
| C4A                                      | Biosystems International Kft         | Bsi0808/ 0808-2       | C4 deficiency, SLE               |
| C4B*                                     | Biosystems International Kft         | Bsi0402/0462100010    | C4 deficiency, SLE               |
| C4B                                      | AVIVA Systems Biology                | OALA02951             | C4 deficiency, SLE               |
| C5*                                      | Biosystems International Kft         | Bsi0765/0765160410    | C5 deficiency                    |
| C6*                                      | AVIVA Systems Biology                | OASA01018             | C6 deficiency                    |
| C7*                                      | AVIVA Systems Biology                | OASA01019             | C7 deficiency                    |
| C8A                                      | Human Protein Atlas                  | HPA028225             | C8 deficiency                    |
| C8A*                                     | Human Protein Atlas                  | HPA054317             | C8 deficiency                    |
| C8B                                      | Biorbyt                              | orb182656             | C8 deficiency                    |
| C9*                                      | Biosystems International Kft         | Bsi0270/0270080320    | C9 deficiency                    |
| FB*                                      | R&D Systems                          | MAB2739 Clone313011   | FB deficiency, aHUS              |
| FB                                       | AVIVA Systems Biology                | OAA05624              | FB deficiency, aHUS              |
| FD*                                      | R&D Systems                          | AF1824                | FD deficiency                    |
| FH                                       | Biosystems International Kft         | Bsi1328/ 1328-2       | FH deficiency, aHUS              |
| FH*                                      | R&D Systems                          | MAB4779 Clone556317   | FH deficiency, aHUS              |
| FI*                                      | Biorbyt                              | orb87484              | FI deficiency, aHUS              |
| Properdin*                               | Abcam                                | ab17780               | Properdin deficiency             |
| CSF3R*                                   | Human Protein Atlas                  | HPA048086             | G-CSF receptor deficiency        |
| p22-phox*                                | AVIVA Systems Biology                | OASA02663             | Autosomal recessive CGD          |
| gp91-phox*                               | MBL International Corporation        | D162-3 Clone7D5       | X-linked CGD                     |
| ELANE*                                   | ABNOVA                               | H00001991-M02         | SCN1, SCN2, Cyclic Neutropenia   |
| HAX1                                     | R&D Systems                          | AF5458                | SCN3                             |
| HAX1*                                    | AVIVA Systems Biology                | OAA08569              | SCN3                             |
| p47-phox *                               | Human Protein Atlas                  | HPA047836             | Autosomal recessive CGD          |
| p47-phox                                 | Human Protein Atlas                  | HPA052095             | Autosomal recessive CGD          |
| p67-phox                                 | Human Protein Atlas                  | HPA002327             | Autosomal recessive CGD          |
| p67-phox *                               | Human Protein Atlas                  | HPA006040             | Autosomal recessive CGD          |
| p40-phox *                               | Human Protein Atlas                  | HPA036156             | Autosomal recessive CGD          |
| Human serum albumin                      | Biosystems International Kft         | Bsi0097/ 0097-6       | positive control                 |
| Human serum albumin                      | Biosystems International Kft         | Bsi2684/ 2684-1       | positive control                 |
| human IgG                                | Jackson Immuno-Research Laboratories | 309-005-082           | positive control                 |
| beads with no antibody                   | -                                    | -                     | negative control (bare beads BB) |

\* Selected antibody is shown in figure 2/ figure S2

\*\* Abbreviations:

SLE: Systemic lupus erythematosus

LOF: Loss of function

GN: Glomerulonephritis

CGD: Chronic granulomatous disease

SCN: Severe congenital neutropenia

G-CSF: Granulocyte colony-stimulating factor

aHUS: Atypical hemolytic uremic syndrome

**Table S2.** Data from standard clinical tests, validating the results from retrospective screening assay.

| Defective protein | Number of samples ## | Value          | Normal range     | Method                       |
|-------------------|----------------------|----------------|------------------|------------------------------|
| C2                | 3                    | <6 %           | 77-159           | Rocket immunoelectrophoresis |
|                   |                      | <6 %           |                  |                              |
|                   |                      | <6 %           |                  |                              |
| C3                | 1                    | <0.06 g/L      | 0,77-1,38        | Nephelometry                 |
| C5                | 1                    | <3 %           | 72-171           | Rocket immunoelectrophoresis |
| C6                | 2                    | <6 %           | 63-154           | Rocket immunoelectrophoresis |
|                   |                      | <6 %           |                  |                              |
| C7                | 3                    | <6 %           | 64-154           | Rocket immunoelectrophoresis |
|                   |                      | <6 %           |                  |                              |
|                   |                      | <6 %           |                  |                              |
| C8                | 1                    | <6 %           | 45-203           | Rocket immunoelectrophoresis |
| C9                | 4                    | not detectable | Qualitative test | Gel diffusion                |
|                   |                      | not detectable |                  |                              |
|                   |                      | not detectable |                  |                              |
|                   |                      | not detectable |                  |                              |
| FB                | 1                    | <3 %           | 59-154           | Rocket immunoelectrophoresis |
| FD                | 3                    | <12.5 %        | 75-141           | Hemolytic gel assay          |
|                   |                      | <12.5 %        |                  |                              |
|                   |                      | <12.5 %        |                  |                              |
| FI                | 8                    | <5 %           | 60-152           | Rocket immunoelectrophoresis |
|                   |                      | <5 %           |                  |                              |
|                   |                      | <5 %           |                  |                              |
|                   |                      | <5 %           |                  |                              |
|                   |                      | <5 %           |                  |                              |
|                   |                      | <5 %           |                  |                              |
|                   |                      | <5 %           |                  |                              |
| Properdin         | 2                    | <6 %           | 54-157           | Rocket immunoelectrophoresis |
|                   |                      | <6 %           |                  |                              |

## Only samples with available matched serum at sufficient volumes were included for validation with standard tests.

## Supplementary Figures

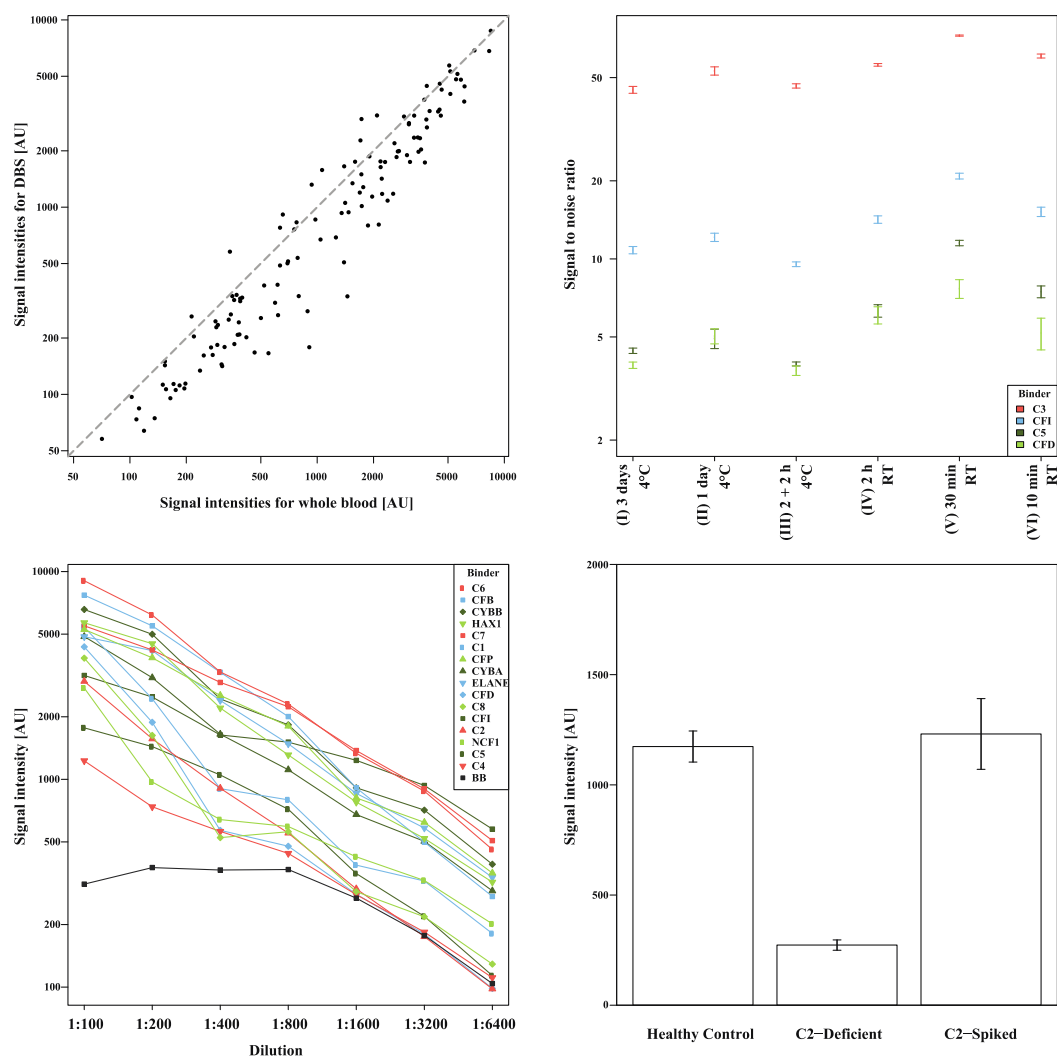

**Figure S1. Data from DBS protein elution and profiling on suspension bead arrays.**

**A)** Protein profiling of blood eluted from filter papers shows a significant correlation to the values from matched whole blood ( $r^2 = 0.96$ ). The median coefficient of variation (CV) of the method was calculated to be 15. **B)** Simultaneous elution and labeling for 30 min at ambient temperature (RT) shows the highest signal-to-background ratio (V). No significant difference is observed for simultaneous elution and labeling (IV) versus separate labeling and elution steps (III). **C)** Linearity-of-dilution test shows significant correlation of signal intensities to the dilution factor ( $r^2 = 0.98$ ) indicating that sample analysis above 1:800 are preferred to allow the detection of as many proteins as possible. **D)** Spiked human C2 recombinant protein into C2-deficient sample confirms the regain of the signal by the addition of the defective protein.

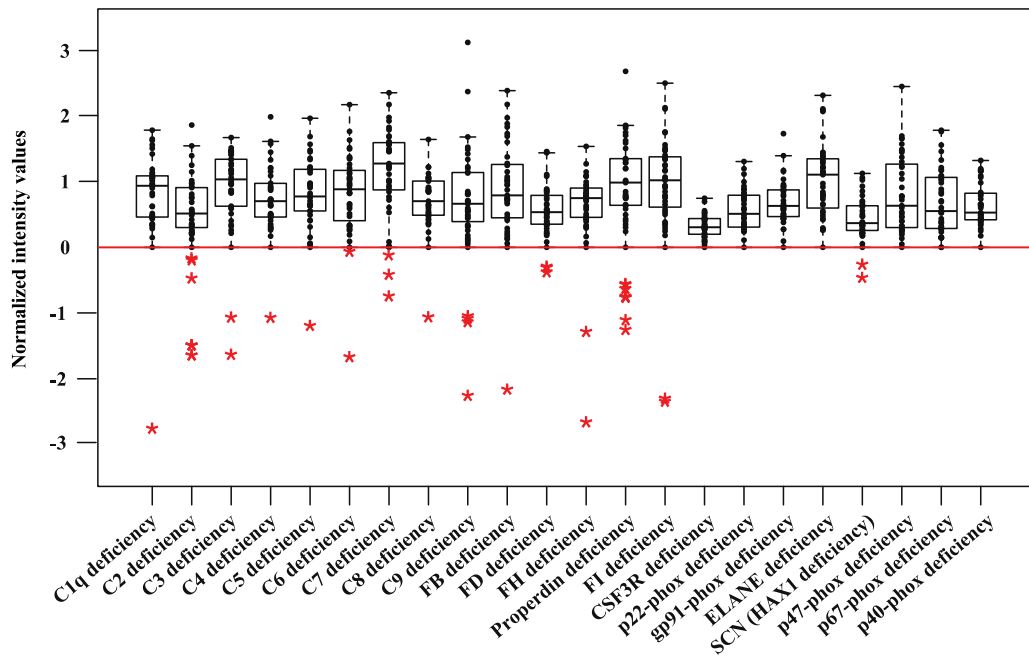

**Figure S2. Data from retrospective PID screening.** Protein profiling is done in multiplexed and obtained signals for each protein are shown in separate boxplots. Deficiency level ( $IQR \geq 1.5$ ) is shown as a red baseline. Deficient samples ( $n=41$ ) are shown in colored asterisks. All samples within the analysed cohort were healthy for the expression of proteins CSF3R, ELANE, p22-phox, gp91-phox, p47-phox, p67phox, and p40-phox.

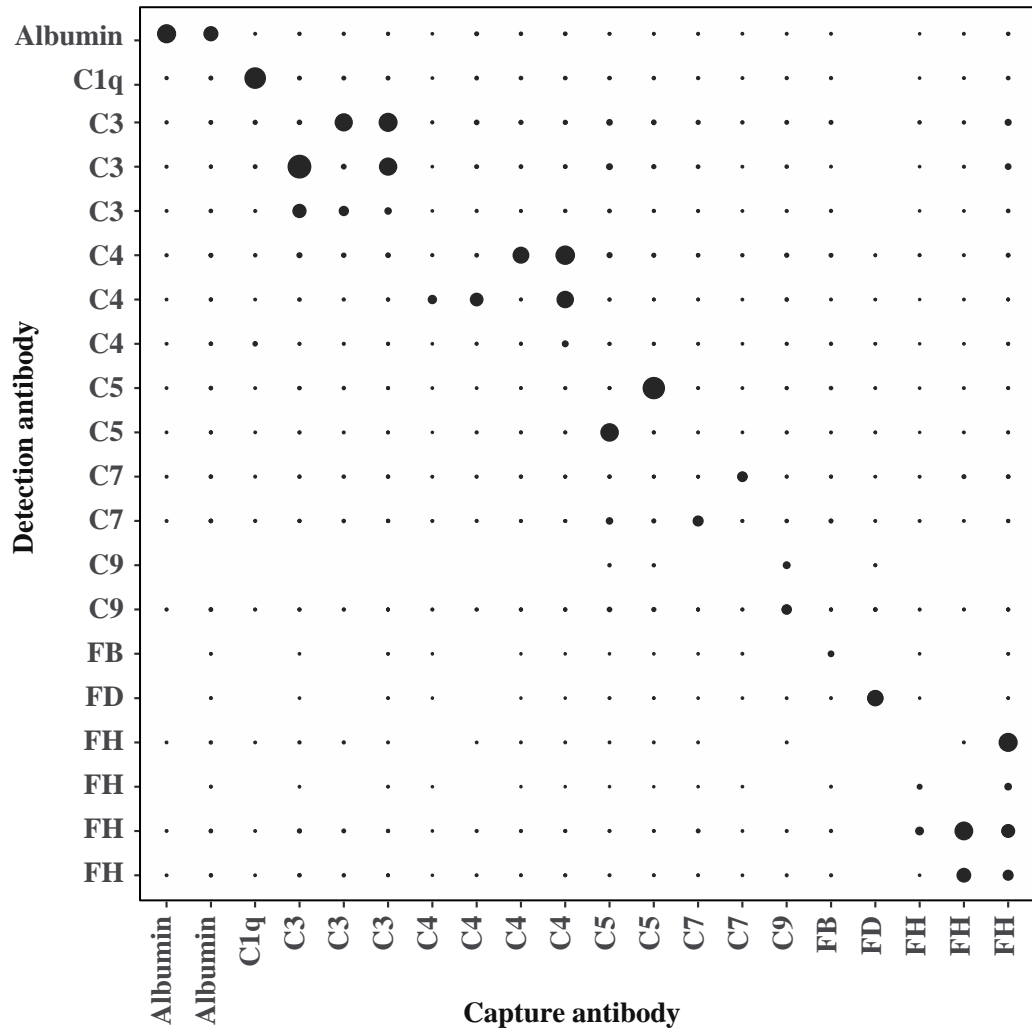

**Figure S3. Data from second-tier sandwich immunoassays.** Signal intensities (shown by the diameter of the circles) illustrate selective detections from the correct combination of capture and detection antibodies.

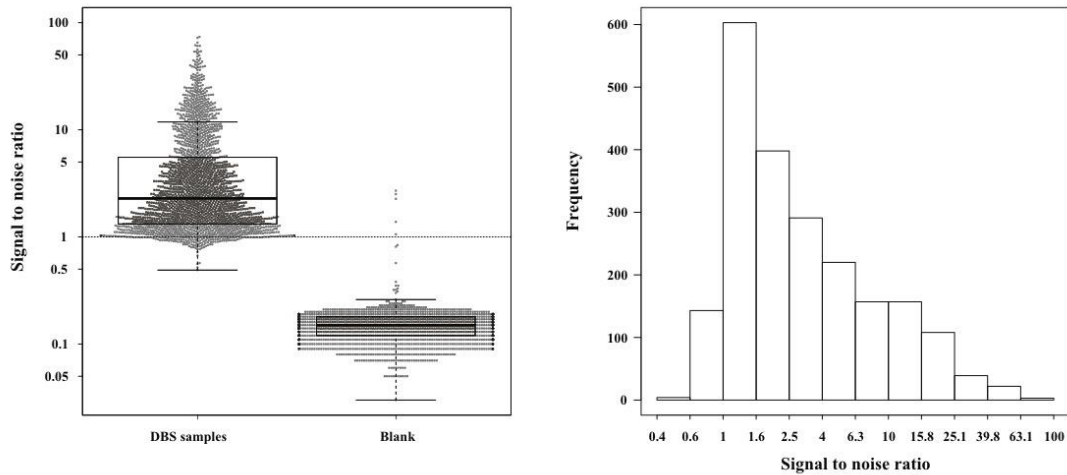

**Figure S4. Data from profiling of 1203 proteins in DBS eluate.** The results confirm the signal-to-noise ratio over the background level (shown in dashed line) for 1156 proteins. This confirms the possibility for an extended array design, when additional protein targets might be required for an updated screening panel.

#### Supplementary references

1 Grumach AS, Ceccon ME, Rutz R, Fertig A, Kirschfink M. Complement profile in neonates of different gestational ages. *Scandinavian journal of immunology*. 2014 Apr;79(4):276-81.
